# Supplementary material for: Synergistic Inorganic Carbon and Denitrification Genes Contributed to Nitrite Accumulation in a Hydrogen-Based Membrane Biofilm Reactor
Source: MDPI journal article supplement (doi:10.3390/bioengineering9050222), 2022-05-20
Supplement: s1 [file s1]

## Supporting information

# Synergistic Inorganic Carbon and Denitrification Genes Contributed to Nitrite Accumulation in a Hydrogen-Based Membrane Biofilm Reactor

Si Pang <sup>1,2</sup>, Bruce E. Rittmann <sup>3</sup>, Chengyang Wu <sup>1,2</sup>, Lin Yang <sup>1,2</sup>, Jingzhou Zhou <sup>1,2</sup> and Siqing Xia <sup>1,2,\*</sup>

<sup>1</sup> State Key Laboratory of Pollution Control and Resource Reuse, College of Environmental Science and Engineering, Tongji University, Shanghai 200092, China; pancy@tongji.edu.cn (S.P.); chengyang@tongji.edu.cn (C.W.); jade\_ylin@tongji.edu.cn (L.Y.); 1910545@tongji.edu.cn (J.Z.)

<sup>2</sup> Shanghai Institute of Pollution Control and Ecological Security, Shanghai 200092, China

<sup>3</sup> Biodesign Swette Center for Environmental Biotechnology, Arizona State University, Tempe, AZ 85287, USA; rittmann@asu.edu

\* Correspondence: siqingxia@tongji.edu.cn; Tel.: +86-21-65980440

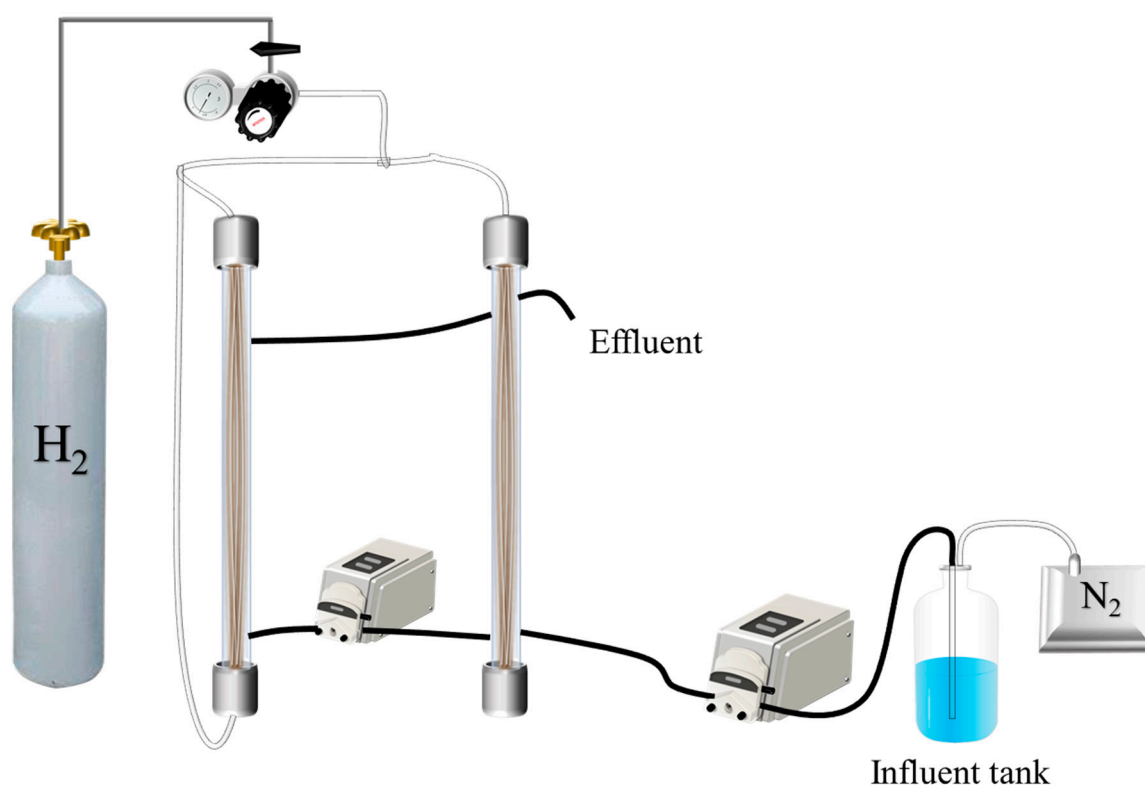

**Figure S1.** Schematic of the  $H_2$ -based MBfR using polypropylene hollow-fiber membranes.

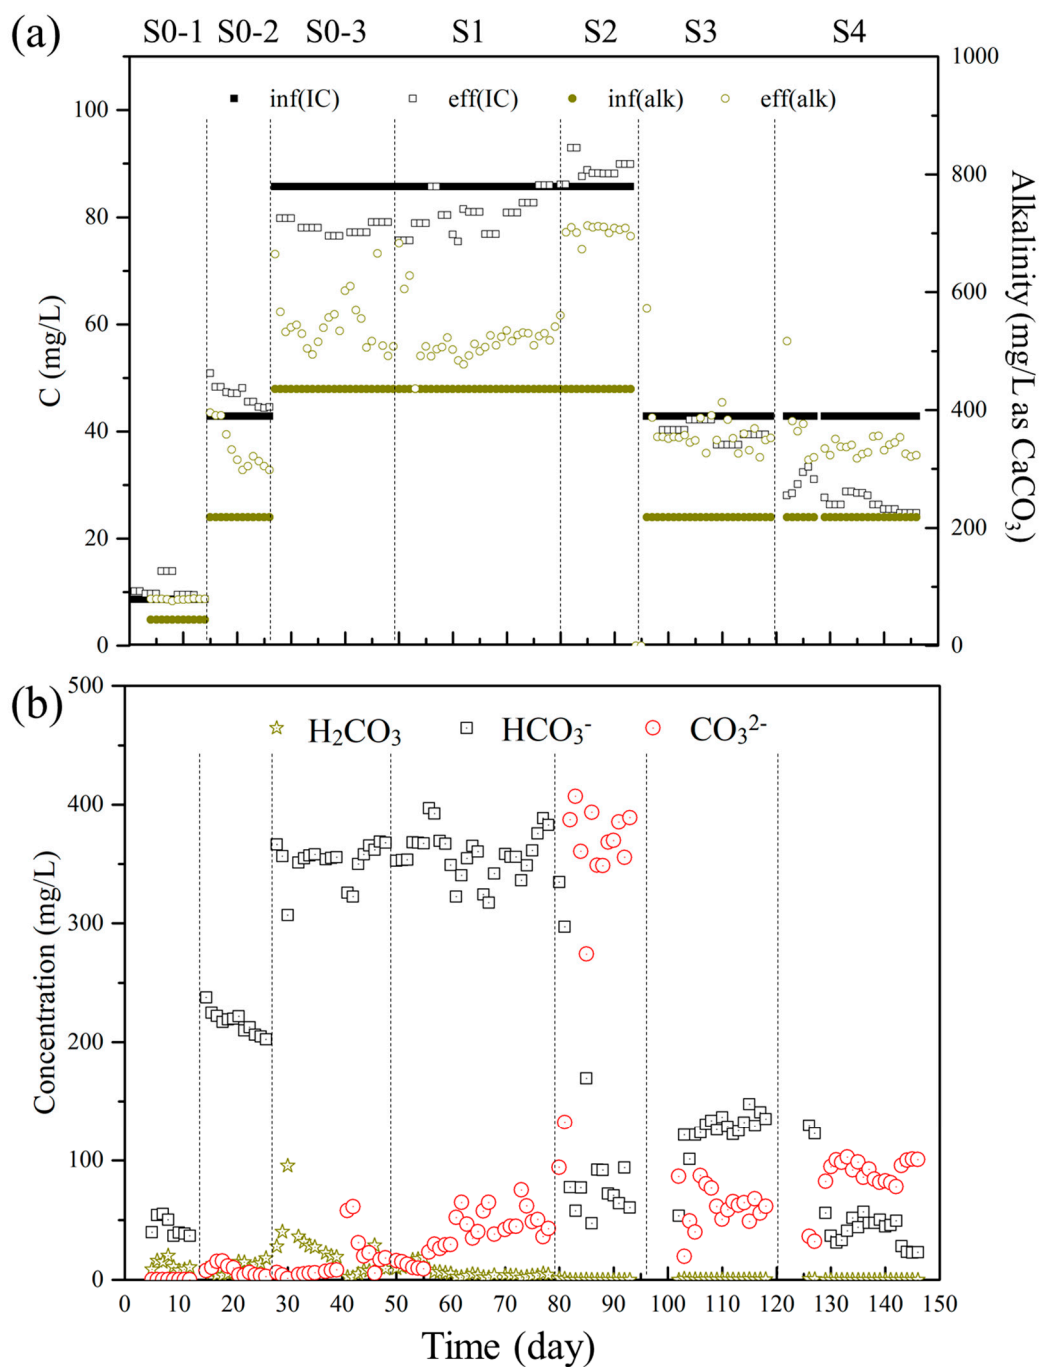

**Figure S2.** (a) Concentration of influent IC and alkalinity, along with effluent IC and alkalinity, at each stage. (b) Evaluated concentrations of H<sub>2</sub>CO<sub>3</sub>, HCO<sub>3</sub><sup>-</sup>, and CO<sub>3</sub><sup>2-</sup> at each stage.

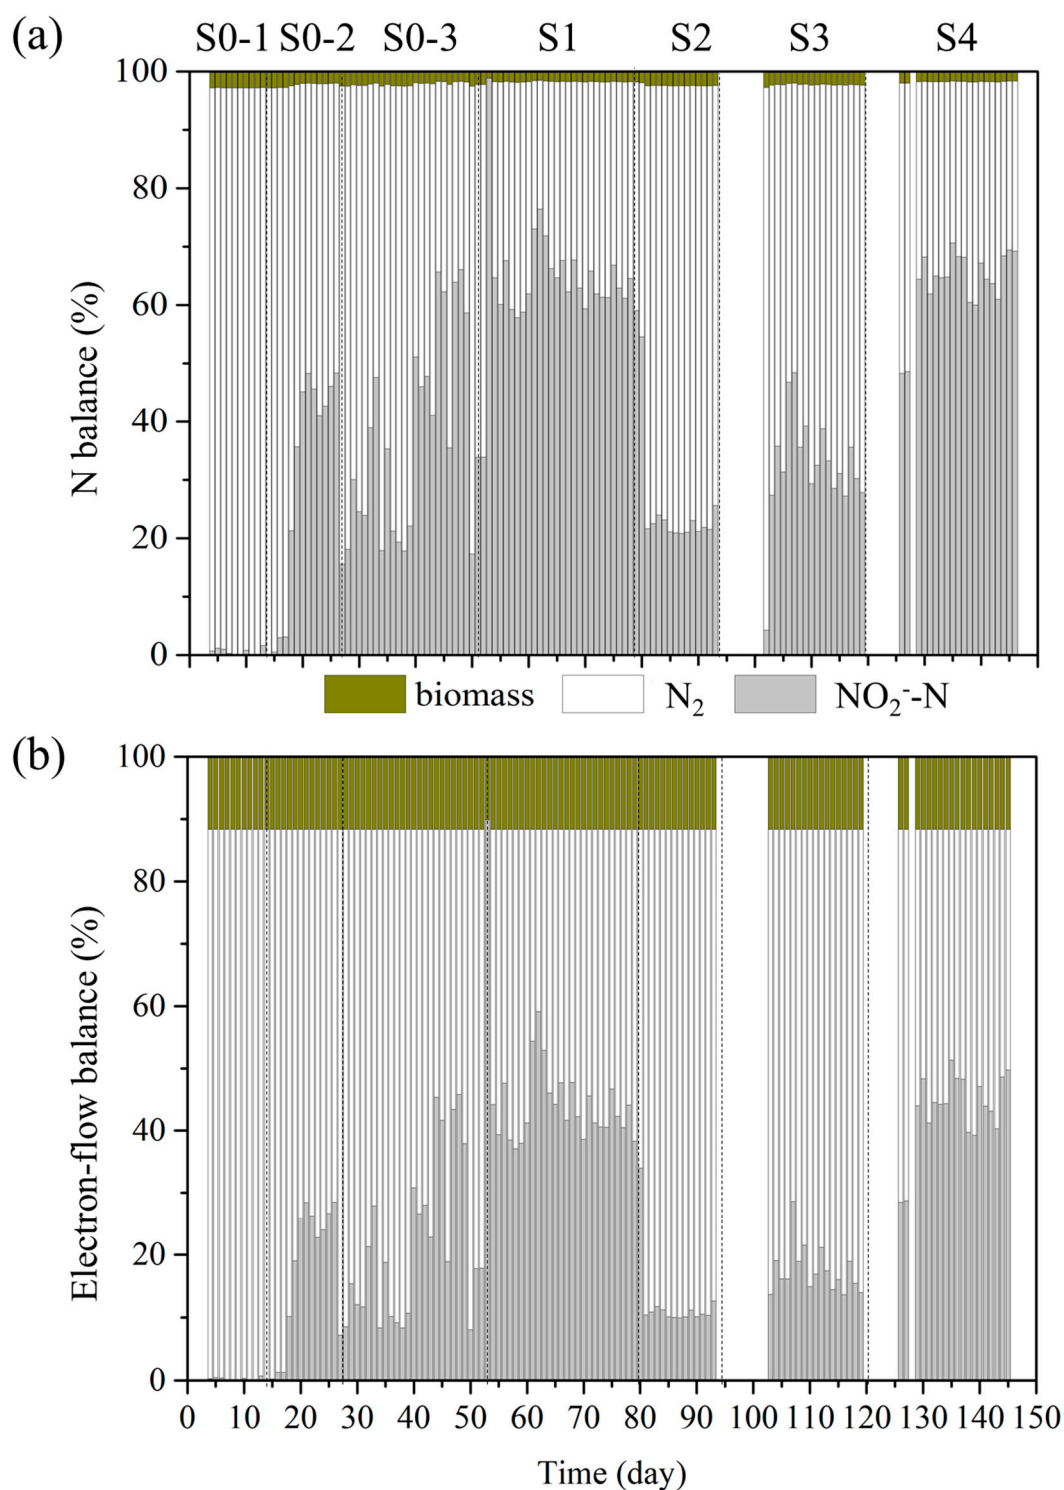

**Figure S3.** The percentages of N-flow balance (a) and electron-flow balance (b), as well as biomass synthesis (a,b), in full and partial denitrification.

**Table S1.** The sequences of primers used in this study.

| Genes        | Primer    | Sequence (5'-3')                     | Concentration used in this study (μmol/L) | Reference |
|--------------|-----------|--------------------------------------|-------------------------------------------|-----------|
| <i>nirS</i>  | NirS cd3F | GTSAACGTSAAGGARACSGG                 | 10                                        | 1         |
|              | NirS 3cdR | GASTTCGGRTGSGTCTTGA                  |                                           |           |
| <i>nirK</i>  | nirK 1F   | GGMATGGTKCCSTGGCA                    | 10                                        | 2         |
|              | nirK 5R   | GCCTCGATCAGRTTGTGGTT                 |                                           |           |
| <i>cnorB</i> | cnorB-2F  | GACAAGNNNTACTGGTGGT                  | 10                                        | 3         |
|              | cnorB-6R  | GAANCCCCANACNCCNGC                   |                                           |           |
| <i>nosZ</i>  | nosZf     | AGAACGACCAGCTGATCGACA                | 10                                        | 4         |
|              | nosZr     | TCCATGGTGACGCCGTGGTTG                |                                           |           |
| <i>napA</i>  | NapAV16   | GCNCCNTGYMGNTTYTGYGG                 | 10                                        | 5         |
|              | NapAV66   | DATNGGRTGCATYTCNGCCATRT              |                                           |           |
| <i>narG</i>  | 1960m2f   | TAYGTSGGGCAGGARAAACTG                | 10                                        | 6         |
|              | 2050m2r   | CGTAGAAGAAGCTGGTGCTGTT               |                                           |           |
| <i>cbbL</i>  | K2f       | ACCA YCAAGCCSAAGCTSGG                | 10                                        | 7         |
|              | V2r       | GCCTTCSAGCTTGCCSACCRC                |                                           |           |
| <i>cbbM</i>  | cbbM F    | TTCTGGCTGGGBGGHGAYTTYATYAAR          | 10                                        | 8         |
|              | cbbM R    | AAYGACGA<br>CCGTGRCCRGVCVCGRTGGTARTG |                                           |           |

**Table S2.** Richness and diversity of the biofilms taken from each stage in the MBfR, revealed by Illumina high-throughput sequencing analysis.

| Sample | DNA concentration (ng/μL) | Sequences | 0.97 similarity |         |         |     |      | Coverage |
|--------|---------------------------|-----------|-----------------|---------|---------|-----|------|----------|
|        |                           |           | OTUs            | Shannon | Simpson | ACE | Chao |          |
| S0-1   | 14.1                      | 38485     | 351             | 4.26    | 0.034   | 358 | 356  | 0.999    |
| S1     | 80.9                      | 31502     | 209             | 2.95    | 0.114   | 248 | 245  | 0.998    |
| S2     | 10.7                      | 35308     | 158             | 1.74    | 0.288   | 201 | 203  | 0.998    |
| S3     | 74.7                      | 41512     | 250             | 2.16    | 0.229   | 286 | 279  | 0.999    |
| S4     | 125.8                     | 34383     | 204             | 2.18    | 0.207   | 267 | 2566 | 0.998    |

**Table S3.** The abundance of known denitrifiers in each sample (% of total reads).

| Genus                                  | S0-1 | S1    | S2    | S3    | S4    |
|----------------------------------------|------|-------|-------|-------|-------|
| <i>Azoarcus</i>                        | 0.00 | 0.45  | 1.54  | 41.30 | 31.26 |
| <i>Thauera</i>                         | 0.00 | 18.02 | 40.59 | 8.60  | 30.10 |
| <i>Hydrogenophaga</i>                  | 0.79 | 0.88  | 1.67  | 3.51  | 7.09  |
| <i>Alishewanella</i>                   | 0.00 | 0.11  | 32.75 | 18.91 | 5.71  |
| <i>Unclassified_ Cyclobacteriaceae</i> | 0.00 | 0.00  | 0.00  | 3.31  | 1.02  |
| <i>Bacillus</i>                        | 0.03 | 3.98  | 0.01  | 0.00  | 0.00  |
| <i>Xanthobacter</i>                    | 1.04 | 8.02  | 0.06  | 0.05  | 0.04  |
| <i>Dechloromonas</i>                   | 6.09 | 0.39  | 0.05  | 0.00  | 0.00  |
| <i>No-rank_ Xanthobacteraceae</i>      | 1.14 | 0.20  | 0.12  | 0.09  | 0.13  |
| <i>Rhodococcus</i>                     | 1.14 | 0.00  | 0.00  | 0.00  | 0.00  |

## References

1. Throback, I.N.; Enwall, K.; Jarvis, A.; Hallin, S. Reassessing PCR primers targeting nirS, nirK and nosZ genes for community surveys of denitrifying bacteria with DGGE. *FEMS Microbiol. Ecol.* **2004**, *49*, 401–417.
2. Braker, G.; Fesefeldt, A.; Witzel, K.P. Development of PCR primer systems for amplification of nitrite reductase genes (nirK and nirS) to detect denitrifying bacteria in environmental samples. *Appl. Environ. Microb.* **1998**, *64*, 3769–3775.
3. Braker, G.; Tiedje, J.M. Nitric oxide reductase (norB) genes from pure cultures and environmental samples. *Appl. Environ. Microb.* **2003**, *69*, 3476–3483.
4. Chon, K.; Chang, J.S.; Lee, E.; Lee, J.; Ryu, J.; Cho, J. Abundance of denitrifying genes coding for nitrate (narG), nitrite (nirS), and nitrous oxide (nosZ) reductases in estuarine versus wastewater effluent-fed constructed wetlands. *Ecol. Eng.* **2011**, *37*, 64–69.
5. Flanagan, D.A.; Gregory, L.G.; Carter, J.P.; Karakas-Sen, A.; Richardson, D.J.; Spiro, S. Detection of genes for periplasmic nitrate reductase in nitrate respiring bacteria and in community DNA. *FEMS Microbiol. Lett.* **1999**, *177*, 263–270.
6. Lopez-Gutierrez, J.C.; Henry, S.; Hallet, S.; Martin-Laurent, F.; Catroux, G.; Philippot, L. Quantification of a novel group of nitrate-reducing bacteria in the environment by real-time PCR. *J. Microbiol. Meth.* **2004**, *57*, 399–407.
7. Nanba, K.; King, G.M.; Dunfield, K. Analysis of facultative lithotroph distribution and diversity on volcanic deposits by use of the large subunit of ribulose 1,5-bisphosphate carboxylase/oxygenase. *Appl. Environ. Microb.* **2004**, *70*, 2245–2253.
8. Campbell, B.J.; Cary, S.C. Abundance of reverse tricarboxylic acid cycle genes in free-living microorganisms at deep-sea hydrothermal vents. *Appl. Environ. Microb.* **2004**, *70*, 6282–6289.
